# Supplementary material for: Identification and validation of novel engineered AAV capsid variants targeting human glia
Source: PubMed Central journal article supplement (PMC11348808; doi:10.3389/fnins.2024.1435212), 2024-08-13
Supplement: Data_Sheet_1.pdf [file Data_Sheet_1.pdf]

## Supplementary Material

### 1 Supplementary Figures and Tables

#### 1.1 Supplementary Figures

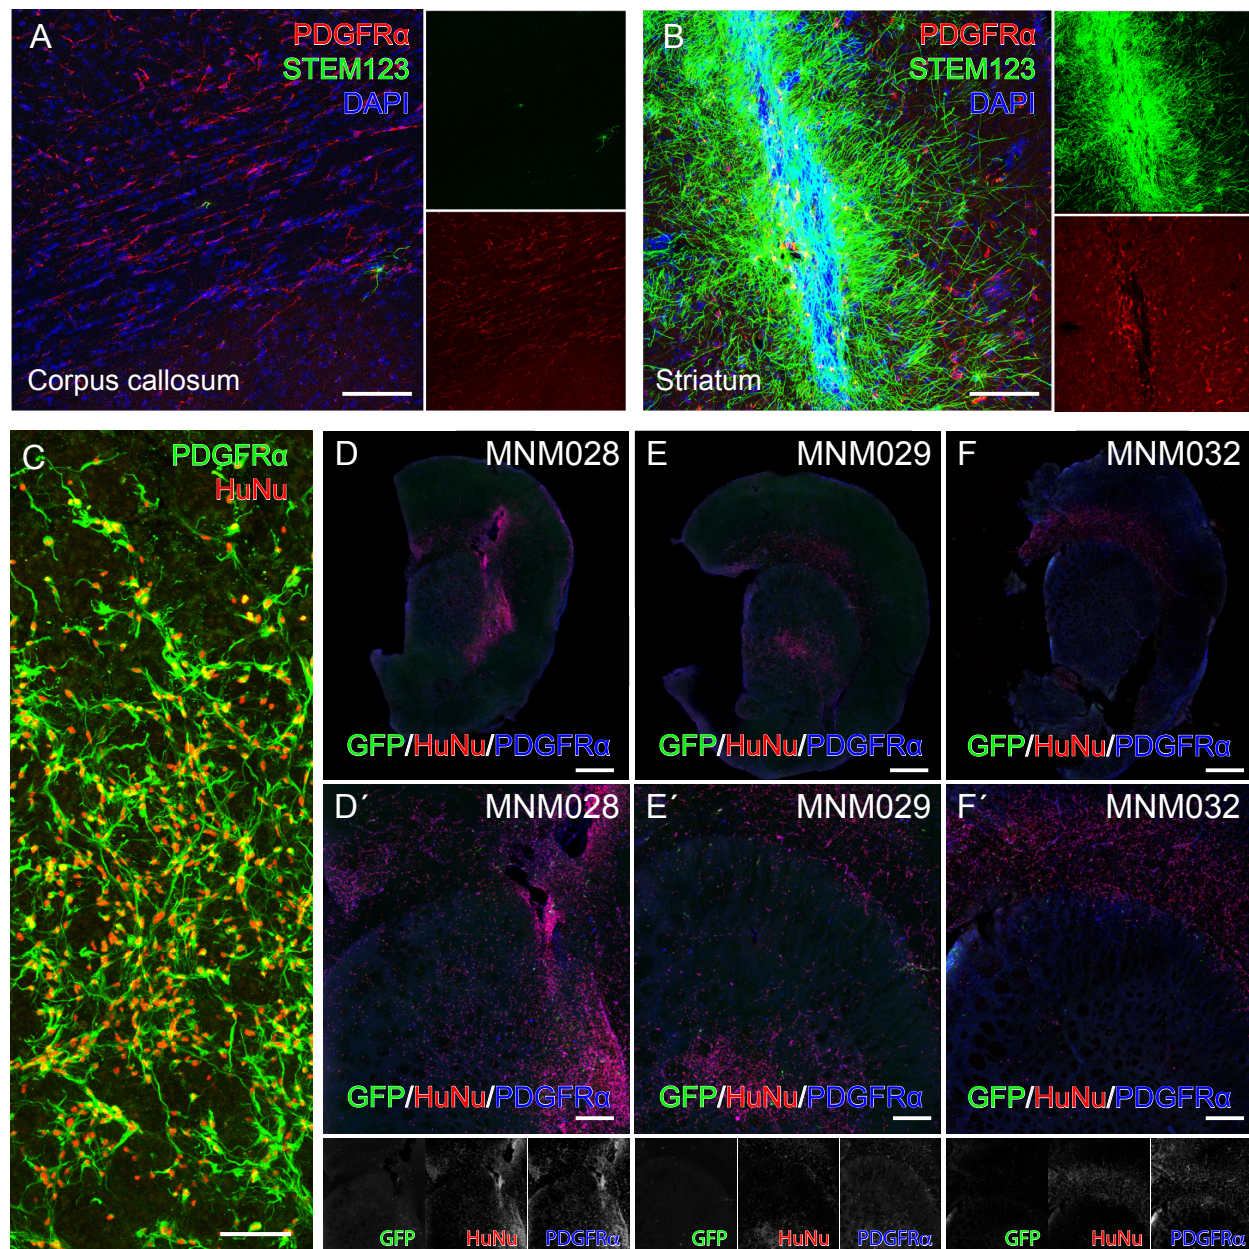

**Supplementary Figure 1.** (A, B) Maintained expression of GPC identity in cells three months post-transplantation into the rat striatum as visualized using staining for PDGFR $\alpha$  and STEM123 on rat brain cryosections. (C) Confocal immunofluorescence image of an optically cleared brain slice that was not subjected to transduction, revealing the presence of transplanted human cells after ten days of *ex vivo* culture. The cells were identified using stainings for HuNu and PDGFR $\alpha$ . (D-F) Confocal

immunofluorescence pictures of optically cleared brain slices showing minimal to no GFP expression after transduction using MNM028, MNM029 and MNM032, with magnifications (D'-F'). Human glial cells were identified using stainings for HuNu and PDGFR $\alpha$ . Maximum intensity projection of full 275  $\mu$ m coronal slices.

Data information: scale bars in (A, B, C) 100  $\mu$ m, in (D-F) 1 mm and in (D'-F') 500  $\mu$ m.

## 1.2 Supplementary Tables

| Cell Batch ID | Days in culture | CD140 <sup>+</sup> /CD44 <sup>-</sup> | CD140 <sup>+</sup> /CD44 <sup>+</sup> | CD140 <sup>-</sup> /CD44 <sup>+</sup> | SSEA4 <sup>+</sup> /CD133 <sup>-</sup> | SSEA4 <sup>+</sup> /CD133 <sup>+</sup> | SSEA4 <sup>-</sup> /CD133 <sup>+</sup> |
|---------------|-----------------|---------------------------------------|---------------------------------------|---------------------------------------|----------------------------------------|----------------------------------------|----------------------------------------|
| J4            | 239             | 47.7%                                 | 3.2%                                  | 0.5%                                  | 0.3%                                   | 0.1%                                   | 18.8%                                  |
| LU7           | 271             | 62.6%                                 | 6.5%                                  | 0.3%                                  | 0.1%                                   | 0.2%                                   | 34.6%                                  |
| LU19          | 262             | 44.9%                                 | 11.2%                                 | 0.5%                                  | 1.6%                                   | 1.1%                                   | 19.6%                                  |
| J1            | 219             | 47.8%                                 | 1.4%                                  | 0.1%                                  | 0.1%                                   | 0.0%                                   | 21.3%                                  |
| LU19          | 263             | 44.5%                                 | 11.9%                                 | 0.3%                                  | 2.6%                                   | 1.2%                                   | 13.6%                                  |
| J4            | 240             | 56.5%                                 | 2.2%                                  | 0.3%                                  | 0.9%                                   | 0.1%                                   | 19.0%                                  |
| LU7           | 272             | 75.6%                                 | 5.1%                                  | 0.1%                                  | 0.2%                                   | 0.1%                                   | 30.6%                                  |
| LU13          | 239             | 34.5%                                 | 27.0%                                 | 1.0%                                  | 1.0%                                   | 0.7%                                   | 24.0%                                  |
| LU28          | 256             | 53.5%                                 | 3.3%                                  | 0.3%                                  | 0.4%                                   | 0.1%                                   | 20.2%                                  |
| J1            | 359             | 34.9%                                 | 59.5%                                 | 0.3%                                  | 0.5%                                   | 1.0%                                   | 68.0%                                  |
| LU13          | 293             | 59.4%                                 | 23.7%                                 | 0.2%                                  | 0.9%                                   | 0.4%                                   | 18.1%                                  |

**Supplementary Table 1.** List of hGPCs that were used for the *in vitro* validation of *de novo* generated AAV capsid variants following flow-cytometry analysis at two weeks post-thawing (corresponding to D(-5)). Related to Figure 2M.

| Capsid variant | CD140 <sup>+</sup> |               | GFP <sup>+</sup> /CD140 <sup>+</sup> |               |
|----------------|--------------------|---------------|--------------------------------------|---------------|
|                | Mean (%)           | SEM ( $\pm$ ) | Mean (%)                             | SEM ( $\pm$ ) |
| AAV2 null      | 58.4               | 13.0          | 77.7                                 | 9.3           |
| AAV2           | 38.1               | 2.9           | 63.9                                 | 6.6           |
| MNM027         | 56.0               | 8.0           | 71.6                                 | 6.0           |
| MNM030         | 51.7               | 7.4           | 63.0                                 | 6.7           |
| AAV9           | 56.3               | 4.6           | 82.2                                 | 2.5           |
| MNM031         | 67.0               | 5.4           | 80.6                                 | 3.9           |
| MNM034         | 51.8               | 9.0           | 73.8                                 | 5.9           |

**Supplementary Table 2.** Percentage of cells analyzed using flow-cytometry from glial spheroids, ten days post-transduction with MNM capsid variants and reference wild-type or null AAVs (biological replicates AAV2 null n = 3; AAV2 n = 4; MNM027 n = 6; MNM030 n = 6; AAV9 n = 9; MNM031 n = 5; MNM034 n= 5). Related to Figures 2P-S.

| Cell Batch ID | Days in culture | CD140 <sup>+</sup> /CD44 <sup>-</sup> | CD140 <sup>+</sup> /CD44 <sup>+</sup> | CD140 <sup>-</sup> /CD44 <sup>+</sup> | SSEA4 <sup>+</sup> /CD133 <sup>-</sup> | SSEA4 <sup>+</sup> /CD133 <sup>+</sup> | SSEA4 <sup>-</sup> /CD133 <sup>+</sup> |
|---------------|-----------------|---------------------------------------|---------------------------------------|---------------------------------------|----------------------------------------|----------------------------------------|----------------------------------------|
| LU28          | 245             | 52.8%                                 | 11.5%                                 | 1.0%                                  | 0.5%                                   | 0.6%                                   | 41.0%                                  |
| J4            | 241             | 52.5%                                 | 11.7%                                 | 1.0%                                  | 0.9%                                   | 0.8%                                   | 33.9%                                  |
| LU28          | 244             | 62.6%                                 | 11.0%                                 | 0.8%                                  | 0.3%                                   | 0.6%                                   | 45.9%                                  |

**Supplementary Table 3.** List of hGPCs batches transplanted into the rat brain following flow-cytometry analysis at two weeks post-thawing. Related to Figure 3.

|        | HuNu <sup>+</sup> |               | HuNu <sup>+</sup> /GFP <sup>+</sup> /PDGFR $\alpha$ <sup>+</sup> |               |
|--------|-------------------|---------------|------------------------------------------------------------------|---------------|
|        | Mean (%)          | SEM ( $\pm$ ) | Mean (%)                                                         | SEM ( $\pm$ ) |
| AAV2   | 9.0               | 0.9           | 18.0                                                             | 3.1           |
| MNM027 | 10.6              | 1.7           | 39.8                                                             | 4.6           |
| MNM030 | 11.8              | 1.3           | 14.4                                                             | 1.0           |
| AAV9   | 11.1              | 1.5           | 5.9                                                              | 1.0           |
| MNM031 | 11.0              | 1.6           | 20.9                                                             | 3.4           |
| MNM034 | 9.0               | 1.6           | 22.8                                                             | 4.6           |

**Supplementary Table 4.** Quantification of the percentage of immunostained HuNu<sup>+</sup> cells in optically cleared brain slices, assessed through Operetta CLS, ten days post-transduction with MNM capsid variants and wild-type AAVs (biological replicates AAV2 n = 5; MNM027 n = 8; MNM030 n = 5; AAV9 n = 5; MNM031 n = 6; MNM034 n = 5). Related to Figures 4A,D,E,H.

| Antigen        | Species | Company (cat. no.)                | Dilution |
|----------------|---------|-----------------------------------|----------|
| HuNu           | Mouse   | Millipore (MAB 1281)              | 1:200    |
| PDGFR $\alpha$ | Rabbit  | Cell Signaling Technology (5241S) | 1:300    |
| STEM123/hGFAP  | Mouse   | Takara (Y40420)                   | 1:500    |

**Supplementary Table 5.** List of primary antibodies used for immunostaining of rat brain cryosections.

| Antigen            | Species | Company (cat. no.)                | Dilution |
|--------------------|---------|-----------------------------------|----------|
| GFP                | Chicken | Abcam (Ab13970)                   | 1:2000   |
| GFAP               | Mouse   | Biolegend (SMI 21)                | 1:500    |
| GFAP               | Chicken | Abcam (Ab5541)                    | 1:1000   |
| HuNu               | Mouse   | Millipore (MAB 1281)              | 1:200    |
| PDGFR $\alpha$     | Goat    | R&D (307na)                       | 1:300    |
| PDGFR $\alpha$     | Rabbit  | Cell Signaling Technology (5241S) | 1:300    |
| STEM121/hCytoplasm | Mouse   | Takara (Y40410)                   | 1:500    |
| STEM123/hGFAP      | Mouse   | Takara (Y40420)                   | 1:500    |

**Supplementary Table 6.** List of primary antibodies used for immunostaining of glial spheroids and *ex vivo* cultured brain slices.

|                                                        |
|--------------------------------------------------------|
| Forward                                                |
| GTCTCGTGGGCTCGGAGATGTGTATAAGAGACAGGGCATCGACTTCAAGGAGG  |
| Reverse                                                |
| TCGTGGCAGCGTCAGATGTGTATAAGAGACAGACGCATCGAGATCGCAGGTGAG |

**Supplementary Table 7.** qPCR primers.
